# Supplementary material
Source: PubMed Central journal article supplement (PMC2952239)
Supplement: supp_M110.136895_Sup.pdf [file supp_M110.136895_Sup.pdf]

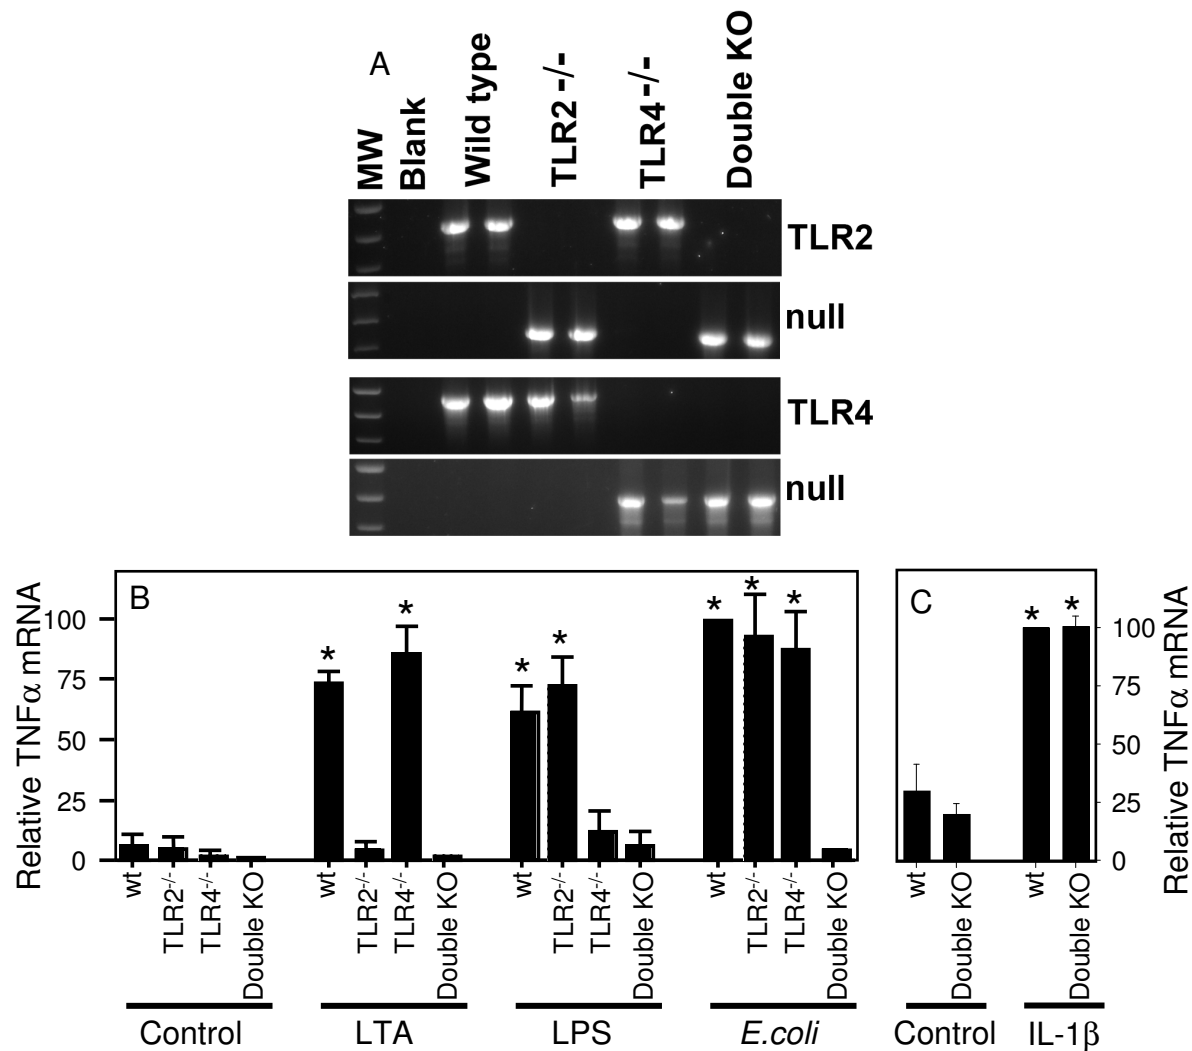

**Supplementary Figure 1. Confirmation of genotype (a) and phenotype (b-c) of TLR2<sup>-/-</sup> mice, TLR4<sup>-/-</sup> mice, and double knock out mice lacking both TLR-2 and TLR-4.** Genotype (a) was assessed by PCR performed on genomic DNA using primers designed to amplify the wild-type or null alleles. Phenotype (b-c) was assessed by measuring TNF $\alpha$  mRNA expression following incubation of bone marrow macrophages with vehicle controls, highly purified soluble LTA (*S. aureus*, 2 ug/ml, InvivoGen), highly purified soluble LPS (*E. coli* K12, 100 ng/ml, InvivoGen), heat-killed *E. coli* K12 ( $3.3 \times 10^6$ /ml, Invitrogen), or IL-1 $\beta$  (10 ng/ml, R&D Systems) as a positive control. Results (mean  $\pm$  SEM of 3-4 experiments) are presented as a percentage of TNF $\alpha$  expression following stimulation of wild-type macrophages with heat-killed *E. coli* (b) or IL-1 $\beta$  (c). \*'s denote  $p < 0.001$  compared to control groups with the same genotype.
